# Supplementary material
Source: Springer Nature journal article supplement (https://www.springermedizin.de/resource/supplementary/12955_2012_1093_MOESM2_ESM.pdf/9559244)
Supplement: MOESM2 [file 9559244]

|        |                    | PROMIS      |              |             |                          |                         | FSFI   |         |              |        |      |             |
|--------|--------------------|-------------|--------------|-------------|--------------------------|-------------------------|--------|---------|--------------|--------|------|-------------|
|        |                    | Interest    | Satisfaction | Orgasm      | Vaginal Discomfort       | Lubrication             | Desire | Arousal | Satisfaction | Orgasm | Pain | Lubrication |
| PROMIS | Interest           |             |              |             |                          |                         |        |         |              |        |      |             |
|        | Satisfaction       | 0.48        |              |             |                          |                         |        |         |              |        |      |             |
|        | Orgasm             | 0.66        | 0.51         |             |                          |                         |        |         |              |        |      |             |
|        | Vaginal discomfort | -0.47       | -0.57        | -0.46       |                          |                         |        |         |              |        |      |             |
|        | Lubrication        | 0.46        | 0.57         | 0.43        | -0.74                    |                         |        |         |              |        |      |             |
| FSFI   | Desire             | <b>0.84</b> | 0.59         | 0.63        | -0.51                    | 0.55                    |        |         |              |        |      |             |
|        | Arousal            | <b>0.71</b> | 0.72         | 0.70        | -0.54                    | 0.58                    | 0.75   |         |              |        |      |             |
|        | Satisfaction       | 0.49        | <b>0.76</b>  | 0.54        | -0.42                    | 0.41                    | 0.59   | 0.69    |              |        |      |             |
|        | Orgasm             | 0.49        | 0.56         | <b>0.76</b> | -0.46                    | 0.50                    | 0.48   | 0.68    | 0.39         |        |      |             |
|        | Pain               | 0.40        | 0.54         | 0.41        | <b>-0.90<sup>a</sup></b> | 0.72                    | 0.46   | 0.50    | 0.45         | 0.43   |      |             |
|        | Lubrication        | 0.47        | 0.60         | 0.46        | -0.68                    | <b>0.92<sup>b</sup></b> | 0.55   | 0.60    | 0.51         | 0.48   | 0.70 |             |

Abbreviations: PROMIS Patient Reported Outcomes Measurement Information System; FSFI Female Sexual Function Index

<sup>a</sup>Some items from the FSFI Pain subdomain are included in the PROMIS Vaginal Discomfort subdomain.

<sup>b</sup>Some items from the FSFI Lubrication subdomain are included in the PROMIS Lubrication subdomain.
